# Supplementary material for: Regulation of Interleukin-10 Receptor Ubiquitination and Stability by Beta-TrCP-Containing Ubiquitin E3 Ligase
Source: PubMed Central journal article supplement (PMC3210801; doi:10.1371/journal.pone.0027464), 2011-11-08
Supplement: pone.0027464.s001.pdf [file pone.0027464.s001.pdf]

## Figure S1

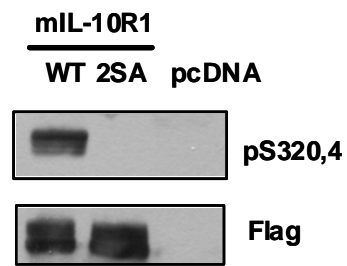

**Figure S1: Phosphorylation of Ser320,4 in transfected mouse IL-10R1.** 293T cells were transfected with the WT or the S320, 4A (2SA) murine IL-10R1. Cell lysates were subjected to IB with pSer320, 4-specific antibody and Flag antibody.
