# Supplementary material for: Regulation of Interleukin-10 Receptor Ubiquitination and Stability by Beta-TrCP-Containing Ubiquitin E3 Ligase
Source: PubMed Central journal article supplement (PMC3210801; doi:10.1371/journal.pone.0027464), 2011-11-08
Supplement: pone.0027464.s003.pdf [file pone.0027464.s003.pdf]

**Figure S3**

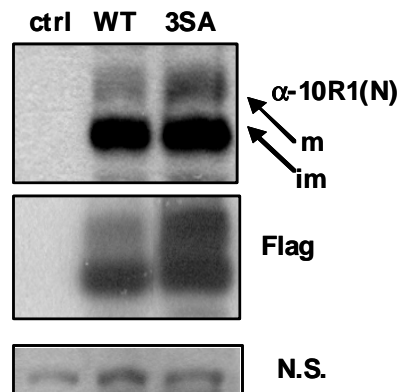

**Figure S3: Western blot analyses using two different antibodies reveal that  $\beta$ TrCP inhibits the expression of mature IL-10R1.** 293T cells were transfected with WT or Ser319, 23, 70A (3SA) hIL-10R1. Lysates were examined by IB using an antibody specifically recognizing the N'-terminus of IL-10R1 ( $\alpha$ -10R1 (N)) or Flag. The mature and immature forms of IL-10R1 are marked by arrows in the  $\alpha$ -10R1 (N) panel. A non-specific (N.S.) band is used as loading control.
