# Supplementary material for: Regulation of Interleukin-10 Receptor Ubiquitination and Stability by Beta-TrCP-Containing Ubiquitin E3 Ligase
Source: PubMed Central journal article supplement (PMC3210801; doi:10.1371/journal.pone.0027464), 2011-11-08
Supplement: pone.0027464.s005.pdf [file pone.0027464.s005.pdf]

## Figure S5

```

ct-hIFNAR1   IVGICIALFALPFVIYAAKVF LRC INYVFFPSLKPSSSIDE-YFSEQPIKNLLSTSEEQ
ct-zCRFB5    LALVLFLLVLLFLCSYRTF-QTFKSVCRPSAQLPAHIQELWLSADATPQILL--SKEC
              :. : : *. : * : : : : * : : : * ** : : : * : * : : : : : ** * : *

ct-hIFNAR1   IEKCFIENISTIATVEETNQ TDE DHK KYSSQTSQ DSGNYS NEDESESKTSEELQ-----
ct-zCRFB5    VCEHMDWALVCAVDTHIPEEP QDS GGCSSDTHSSG DSGVYS EEDSATHSHSLKNTH
              : : : : : : : * : : * . . . : : * ** * ** : : . * . * .

ct-hIFNAR1   -----QDFV
ct-zCRFB5    THDHTLLTDTL
              * :

```

**Figure S5: A conserved DSGXYS motif is present in the zebrafish ortholog of IFNAR1.** Alignment of the cytoplasmic tail of hIFNAR1 (ct-hIFNAR1) and the zebrafish CRFB5 (ct-zCRFB5) is done as in Fig. S4. The conserved  $\beta$ Trcp site is highlighted in yellow.
